# Supplementary figures and images for: Structural deformation phenomenon of synthesized poly(isosorbide-1,4-cyclohexanedicarboxylate) in hot water
Source: Royal Society of Chemistry journal article supplement (doi:10.1039/c6ra26532d), 2017-01-01

## Supporting Information

S1.  $^{13}\text{C}$ -NMR Spectrum of PICD-200

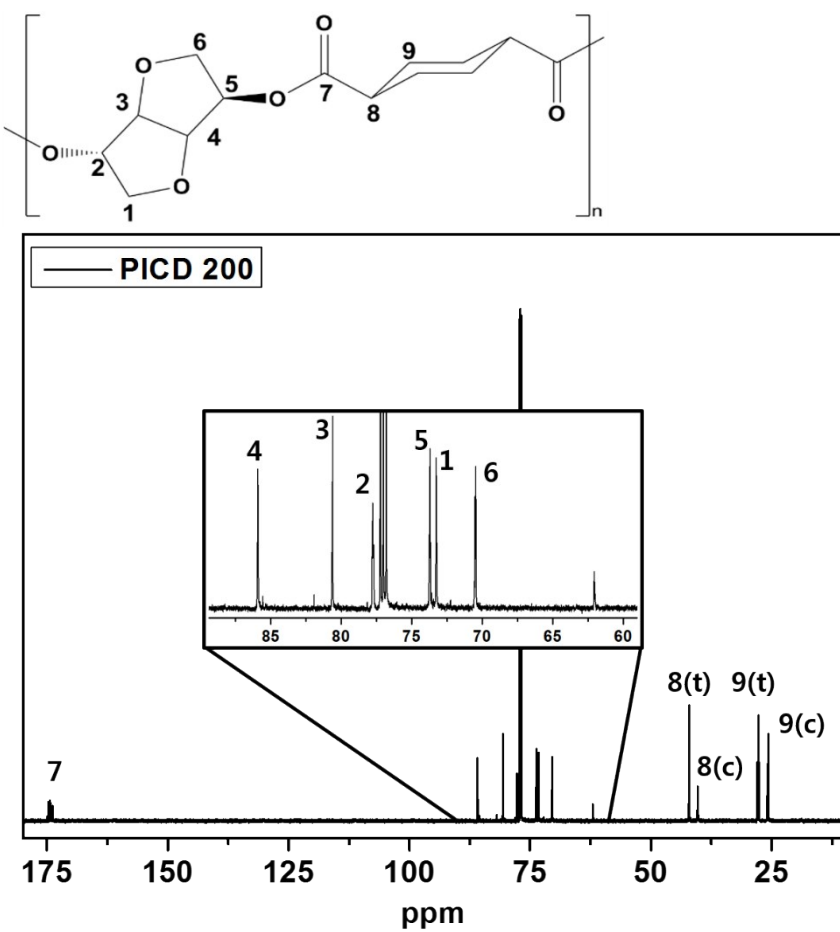

Supplement: c6ra26532d1.pdf [file c6ra26532d1.pdf]
